# Supplementary material for: Using the yeast three-hybrid system for the identification of small molecule-protein interactions with the example of ethinylestradiol
Source: publisher site journal article supplement (doi:10.1515/hsz-2021-0355), 2022-02-28
Supplement: Supplementary file 1 [file j_hsz-2021-0355_suppl.docx]

**Using the yeast three-hybrid system for the identification of small molecule-protein interactions with the example of ethinylestradiol**

Pengyu Wang, Thomas Klassmüller, Cornelia A. Karg, Maibritt Kretschmer, Stefan Zahler, Simone Braig, Franz Bracher, Angelika M. Vollmar, and Simone Moser

**Supplementary material**

**Table of Contents**

1. Synthesis and characterization of trimethoprim derivatives………………………………3

2. Synthesis and characterization of biotin-PEG-ethinylestradiol………………................11

3. Cloning of the bait and prey vector for spot test……………………………………….…12

4. Sequencing result of PLOD2 hit……………………………………………...……...……..13

5. Colony PCR…………………………………….…………………………………………….14

6. Affinity chromatography……………………...…………………………………………….14

7. PLOD2 expression levels…………………………………………………………..……….21

**1. Synthesis and characterization of trimethoprim derivatives**

The required trimethoprim derivatives with PEG linker and terminal functionalization (amine, azide) for subsequent coupling were prepared as follows:

Regioselective demethylation of trimethoprim with hydrobromic acid gave the 4’’-hydroxy compound **TMP-OH**. Etherification with ethyl 4-bromobutyrate using Cs2CO3 as base gave ester **THK-5**, which was converted into the corresponding free carboxylic acid **THK-11** by alkaline hydrolysis. Trimethoprim-PEG-azide (**THK-15**) was obtained by subsequent amidation with 11-azido-3,6,9-trioxaundecan-1-amine using 1-(3-dimethylaminopropyl)-3-ethylcarbodiimide (EDC) as coupling reagent. Finally, Staudinger reduction of the azido group with triphenylphosphine in wet methanol gave the primary amine trimethoprim-PEG-amine (**THK-42**) (see Scheme below).

Trimethoprim-PEG-amine (**THK-42**) was utilized for the synthesis of trimethoprim-PEG-purvalanol B by means of PyBOP-mediated amidation.

Trimethoprim-PEG-azide (**THK-15**) was converted into trimethoprim-PEG-ethinylestradiol in a CuSO4/sodium ascorbate-mediated alkyne-azide click reaction with ethinylestradiol (EE).

**Compounds**

**4-((2,4-Diaminopyrimidin-5-yl)methyl)-2,6-dimethoxyphenol (TMP-OH)**

Trimethoprim (5.02 g, 17.3 mmol) was dissolved in 60 ml HBr (48% in water) at 90°C. After heating to reflux for 20 min, 12 ml of NaOH (50% in water) was added dropwise with stirring. The solution was cooled to room temperature and stored overnight in a refrigerator at 4°C resulting in a beige crystalline solid. This solid was recrystallized from water after the pH of the hot solution was adjusted to 7 with NaOH (50% in water). The resulting colorless crystals were collected by filtration and dried under vacuum to afford 2.89 g (10.5 mmol, 60.5%) **TMP-OH**. m.p. 267°C. 1H NMR (400 MHz, DMSO-d6) δ 8.13 (s, 1H, 4’’-OH), 7.46 (s, 1H, 6-H), 6.49 (s, 2H, 2’’-H and 6’’-H), 6.13 (s, 2H, 4-NH2), 5.76 (s, 2H, 2-NH2), 3.70 (s, 6H, 3’’-OCH3 and 5’’-OCH3), 3.47 (s, 2H, 1’-H). 13C NMR (101 MHz, DMSO-d6) δ 162.74 (C2), 162.25 (C4), 155.16 (C6), 148.34 (C3‘‘ and C5‘‘), 134.20 (C4‘‘), 130.28 (C1‘‘), 106.82 (C5), 106.55 (C2‘‘ and C6‘‘), 56.41 (3‘‘-OCH3 and 5‘‘-OCH3), 33.23 (C1‘). IR (ATR): ṽmax/cm-1 = 3328, 3175, 2841, 1667, 1498, 1448, 1403, 1347, 1321, 1293, 1240, 1120, 1035, 968, 921, 867, 811, 781, 765, 621. HRMS (EI): calcd. for C13H16N4O3 (M)•+: 276.1222 found: 276.1216.

**Ethyl 4-(4-((2,4-diaminopyrimidin-5-yl)methyl)-2,6-dimethoxyphenoxy)**

**-butanoate (THK-5)**

**TMP-OH** (1.33 g, 4.83 mmol) was dissolved in 25 ml DMF and Cs2CO3 (3.15 g, 9.66 mmol, 2 eq) was added. The suspension was stirred at room temperature for 20 min, then ethyl 4-bromobutyrate (1.04 ml, 7.24 mmol, 1.5 eq) was added dropwise into the orange mixture. After the addition the reaction was heated at 50°C for 5 h with stirring. Then the mixture was diluted with water (50 ml) and extracted with ethyl acetate (4 x 25 ml). The combined organic layers were washed with brine (2 x 25 ml), dried over anhydrous MgSO4 and concentrated in vacuo. The crude product was purified by silica gel column chromatography (dichloromethane/methanol 30:1) to afford **THK-5** as a yellow solid (0.83 g, 2.13 mmol, 44%). m.p. 144.2°C. 1H NMR (400 MHz, methanol-d4) δ 7.52 (s, 1H, 6-H), 6.53 (s, 2H, 2’’-H, 6’’-H), 4.14 (q, J = 7.1 Hz, 2H, CH2-CH3), 3.94 (t, J = 6.0 Hz, 2H, 1’’’-H), 3.79 (s, 6H, 3’’-OCH3 and 5’’-OCH3), 3.65 (s, J = 0.8 Hz, 2H, 1’-H), 2.61 (t, J = 7.3 Hz, 2H, 3’’’-H), 1.96 (tt, J = 7.3, 6.0 Hz, 2H, 2’’’-H), 1.26 (t, J = 7.1 Hz, 3H, CH2-CH3). 13C NMR (101 MHz, methanol-d4) δ 176.26 (C4’’’), 165.36 (C2), 163.91 (C4), 156.42 (C6), 155.71 (C3‘‘ and C5‘‘), 137.43 (C4’’), 137.19 (C1’’), 108.98 (C5), 107.56 (C2‘‘ and C6‘‘), 74.08 (C1’’’), 62.28 (CH2-CH3), 57.36 (3‘‘-OCH3 and 5‘‘-OCH3), 35.34 (C1’), 32.44 (C3’’’), 27.32 (C2’’’), 15.41 (CH2-CH3). IR (ATR): ṽmax/cm-1 = 3473, 3334, 3180, 2942, 1734, 1664, 1619, 1600, 1559, 1506, 1460, 1426, 1376, 1336, 1321, 1238, 1175, 1125, 1046, 980, 926, 836, 791, 767, 702, 635, 579, 527, 459. HRMS (EI): calcd. for C19H26N4O5 (M)•+: 390.1903 found: 390.1896.

**4-(4-((2,4-Diaminopyrimidin-5-yl)methyl)-2,6-dimethoxyphenoxy)**

**-butanoic acid (THK-11)**

**THK-5** (636 mg, 1.63 mmol) was dissolved in 7 ml methanol and 2.5 ml aqueous 2 m NaOH were added. The solution was stirred at 45°C for 2 h, then the methanol was evaporated. To the resulting precipitate were added 1.6 ml water and the pH was brought to 7 with 2 m HCl. The suspension was stored at 7°C in a refrigerator and the precipitate was collected by filtration and washed with 20 ml cold water to afford **THK-11** as a light yellow solid (464 mg, 1.28 mmol, 78.6%). m.p. 244.5°C. 1H NMR (400 MHz, DMSO-d6) δ 7.50 (s, 1H, 6-H), 6.54 (s, 2H, 2’’-H and 6’’-H), 6.14 (s, 2H, 4-NH2), 5.77 (s, 2H, 2-NH2), 3.80 (t, J = 6.2 Hz, 2H, 1’’’-H), 3.70 (s, 6H, 3’’-OCH3 and 5’’-OCH3), 3.52 (s, 2H, 1’-H), 2.41 (t, J = 7.4 Hz, 2H, 3’’’-H), 1.79 (p, J = 6.2 Hz 2H, 2’’’-H). 13C NMR (101 MHz, DMSO-d6) δ 174.96 (COOH), 162.73 (C4), 162.45 (C2), 155.58 (C6), 153.28 (C3‘‘ and C5‘‘), 136.15 (C1‘‘), 135.14 (C4‘‘), 106.32 (C5), 106.27 (C2‘‘ and C6‘‘), 71.99 (C1‘‘‘), 56.29 (3‘‘-OCH3 and 5‘‘-OCH3), 33.43 (C1‘), 30.61 (C3‘‘‘), 25.58 (C2‘‘‘). IR (ATR): ṽmax/cm-1 = 3284, 3111, 2940, 1665, 1591, 1560, 1504, 1642, 1422, 1400, 1334, 1319, 1307, 1237, 1135, 1049, 1012, 884, 846, 794, 715, 576, 537, 419. HRMS (EI): calcd. for C17H22N4O5 (M)•+: 362.1590 found: 362.1582.

**N-(2-(2-(2-(2-azidoethoxy)ethoxy)ethoxy)ethyl)-4-(4-((2,4-diaminopyrimidin-5-yl)methyl)-2,6-dimethoxyphenoxy)butanamide, THK-15)**

**THK-11** (150 mg, 0.415 mmol), 4-(dimethylamino)pyridine (25.3 mg, 0.207 mmol, 0.5 eq) and 1-(3-dimethylaminopropyl)-3-ethylcarbodiimide hydrochloride (95.5 mg, 0.498 mmol were dissolved in 3 ml DMF and 11-azido-3,6,9-trioxaundecan-1-amine (109 mg, 0.498 mmol, 1.2 eq) was added. The resulting white suspension was stirred at room temperature for 24 h, then the solvent was evaporated. The crude product was purified by silica gel column chromatography (dichloromethane/methanol 5:1) to afford **THK-15** as a light-yellow solid (146 mg, 0.26 mmol, 63%). m.p. 80.2°C. 1H NMR (400 MHz, DMSO-d6) δ 7.84 (t, J = 5.7 Hz, 1H, 4’’’-CONH), 7.51 (s, 1H, 6-H), 6.55 (s, 2H, 2’’-H and 6’’-H), 6.27 (s, 2H, 4-NH2), 5.87 (s, 2H, 2-NH2), 3.77 (t, J = 6.5 Hz, 2H, 1’’’-H), 3.72 (s, 6H, 3’’-OCH3 and 5’’-OCH3), 3.68 – 3.34 (m, 14H, OCH2), 3.20 (q, J = 5.6 Hz, 2H, NCH2), 2.25 (t, J = 7.5 Hz, 2H, 3’’’-H), 1.80 (dq, J = 8.2, 6.6 Hz, 2H, 2’’’-H). 13C NMR (101 MHz, DMSO-d6) δ 172.42 (C4‘‘‘), 162.84 (C2), 161.95 (C4), 154.66 (C6), 153.32 (C3‘‘ and C5‘‘), 135.94 (C4‘‘), 135.22 (C1‘‘), 106.54(C5), 106.32 (C2‘‘ and C6‘‘), 72.39 (C1‘‘‘), 70.26 (OCH2), 70.23 (OCH2), 70.15 (OCH2), 70.03 (OCH2), 69.71 (OCH2), 69.59 (OCH2), 56.31 (3‘‘-OCH3 and 5‘‘-OCH3), 50.46 (CH2-N3), 38.96 (NCH2), 33.37 (C1‘), 32.28 (C3‘‘‘), 26.29 (C2‘‘‘). IR (ATR): ṽmax/cm-1 = 3354, 3195, 2896, 2103, 1662, 1620, 1593, 1553, 1504, 1458, 1419, 1365, 1324, 1243, 1127, 1094, 1035, 973, 939, 861, 837, 794, 675, 581. HRMS (EI): calcd. for C25H38N8O7 (M)•+: 562.2863 found: 562.2854.

**N-(2-(2-(2-(2-aminoethoxy)ethoxy)ethoxy)ethyl)-4-(4-((2,4-diaminopyrimidin-5-yl)methyl)-2,6-dimethoxyphenoxy)butanamide, THK-42)**

**THK 15** (120 mg, 0.21 mmol) was dissolved in 1.5 ml methanol and 75 µl water and triphenylphosphine (169 mg, 0.64 mmol, 3 eq) was added. The mixture was stirred for 18 h and the solvent was evaporated. The crude product was purified by silica gel column chromatography (dichloromethane/methanol 7:1 containing 1% TEA) to afford **THK-42** as a yellow oil (72 mg, 0.13 mmol, 63%). 1H NMR (500 MHz, DMSO-d6) δ 7.86 (t, J = 5.7 Hz, 1H, 4’’’-CONH), 7.51 (s, 1H, 6-H), 6.54 (s, 2H, 2’’-H and 6’’-H), 6.07 (s, 2H, 4-NH2), 5.67 (s, 2H, 2-NH2), 3.76 (t, J = 6.4 Hz, 2H, 1’’’-H), 3.71 (s, 6H, 3’’-OCH3 and 5’’-OCH3), 3.51 (s, 2H, 1’-H), 3.51 – 3.33 (m, 12H, OCH2 and CH2NH2), 3.19 (m, 2H, NCH2), 2.66 (t, 2H, CH2NH2), 2.24 (t, J = 7.5 Hz, 2H, 3’’’-H), 1.85 – 1.73 (m, 2H, 2’’’-H). 13C NMR (126 MHz, DMSO-d6) δ 172.39 (C4‘‘‘), 162.72 (C2), 162.66 (C4), 156.18 (C6), 153.30 (C3‘‘ and C5‘‘), 136.23 (C4‘‘), 135.17 (C1‘‘), 106.28 (C2‘‘ and C6‘‘), 106.23 (C5), 72.39 (C1‘‘‘), 70.24 (OCH2), 70.20 (OCH2), 70.04 (OCH2), 69.62 (OCH2), 56.31 (3‘‘-OCH3 and 5‘‘-OCH3), 41.54 (CH2NH2), 38.96 (NCH2), 33.45 (C1‘), 32.28 (C3‘‘‘), 26.30 (C2‘‘‘). IR (ATR): ṽmax/cm-1 = 3348, 1630, 1458, 1241, 1124, 1036, 806, 584. HRMS (EI): calcd. for C25H40N6O7 (M)•+: 536.2953 found: 536.2949.

**Trimethoprim-PEG-purvalanol B**

Purvalanol B (3.0 mg, 6.9 μmol) and PyBOP (9.0 mg, 17.3 μmol, 2.5 eq) were dissolved in 0.3 ml of DMSO. Triethylamine (3.0 μl, 20.8 μmol, 3 eq) was added and the mixture was stirred for 45 min at room temperature in the dark. Trimethoprim-PEG-amine (**THK42**) (4.0 mg, 7.6 μmol, 1.1 eq) was added and the reaction mixture was stirred at room temperature in the dark overnight. The reaction mixture was purified by preparative HPLC (see methods part main text), solvents were evaporated in vacuo to yield 3.3 mg (3.5 μmol, 50%) of trimethoprim-PEG-purvalanol B. 1H NMR (500 MHz, methanol-d4) δ 8.31 (s, 1H), 7.91 (s, 1H), 7.75 (s, 1H), 7.45 (m, 1H), 7.33 (s, 1H), 7.31 (s, 1H), 6.51 (s, 1H), 5.17 (s, 1H), 4.72 – 4.66 (m, 3H), 4.58 (s, 4H), 4.00 (m, 2H), 3.80 – 3.41 (m, 20H), 2.04 (s, 2H), 1.95 (s, 6H), 1.61 – 1.56 (m, 6H), 1.04 (t, *J* = 6.8 Hz, 6H). HRMS (ESI): calcd. for C45H63ClN12O9 (M)•+: 951.4602 found: 951.4601.

**Trimethoprim-PEG-ethinylestradiol**

Ethinylestradiol (2.0 mg, 6.7 μmol) and trimethoprim-PEG-azide (**THK15**) (3.8 mg, 6.7 μmol, 1 eq) were dissolved in 1.35 ml of DMSO. A catalyst mixture of 30 μl of CuSO4 pentahydrate (25 mg/ml in H2O), 167 μl of 20 mm tris((1-benzyl-4-triazolyl)methyl)amine (TBTA) in DMSO and 67 μl of sodium ascorbate (100 mg/ml) in H2O was prepared separately and immediately added to the mixture of ethinylestradiol and **THK15**. The mixture was stirred at room temperature under nitrogen atmosphere overnight. The reaction mixture was cleaned up by preparative HPLC (see methods part main text). The solvents were evaporated in vacuo to yield 4.6 mg (5.4 μmol, 80%) of trimethoprim-PEG-ethinylestradiol. 1H NMR (500 MHz, methanol-d4) δ 7.87 (s, 1H), 7.29 (s, 1H), 6.98 (d, *J* = 8.4 Hz, 1H), 6.53 (s, 2H), 6.49 (dd, *J* = 8.4, 2.6 Hz, 1H), 6.46 (d, *J* = 2.7 Hz, 1H), 4.56 (s, 2H), 3.91 (t, *J* = 6.1 Hz, 3H), 3.78 (s, 6H), 3.58 (d, *J* = 2.6 Hz, 2H), 3.54 (s, 3H), 3.49 (t, *J* = 5.4 Hz, 2H), 2.80 – 2.70 (m, 2H), 2.66 (s, 1H), 2.44 (t, *J* = 7.4 Hz, 2H), 2.03 (s, 1H), 1.95 (dt, *J* = 13.5, 6.5 Hz, 3H), 1.84 (s, 1H), 1.64 – 1.52 (m, 3H), 1.46 – 1.37 (m, 2H), 1.29 (d, *J* = 5.1 Hz, 1H), 1.05 (s, 3H). 13C NMR (500 MHz, methanol-d4) δ 171.64, 166,31, 165.38, 155.96, 154.96, 138.87, 136.91, 135.18, 132.46, 127.15, 116.06, 113.70, 107.04, 73.36, 71.59, 71.46, 71.25, 70.58, 56.64, 44.98, 41.09, 40.41, 34.33, 33.63, 30.72, 30.67, 28.79, 27.55, 27.36, 14.88. HRMS (ESI): calcd. for C45H62N8O9 (M)•+: 859.4713 found: 859.4697.

**2. Synthesis and characterization of biotin-PEG-ethinylestradiol**

Biotin-PEG3-N3 (2.0 mg, 4.5 μmol) and ethinylestradiol (6.67 mg, 22.5 μmol, 5 eq) were dissolved in 0.5 ml of DMSO. A catalyst mixture of 25 μl of CuSO4 pentahydrate (25 mg/ml in H2O), 115 μl of 20 mm TBTA in DMSO and 45 μl of sodium ascorbate (100 mg/ml in H2O) was prepared separately and immediately added to the mixture of biotin-PEG-N3 and ethinylestradiol. The mixture was stirred at room temperature under nitrogen atmosphere overnight. The reaction mixture was cleaned up by preparative HPLC (see methods part main text). The solvents were evaporated in vacuo to yield 3 mg (4.1 μmol, 89%) of biotin-PEG-ethinylestradiol. 1H NMR (500 MHz, methanol-d4) δ 7.86 (s, 1H), 6.99 (d, *J* = 8.4 Hz, 1H), 6.50 (dd, *J* = 8.5, 2.7 Hz, 1H), 6.46 (d, *J* = 2.7 Hz, 1H), 4.47 (ddd, *J* = 7.9, 5.0, 0.9 Hz, 1H), 4.28 (dd, *J* = 7.9, 4.4 Hz, 1H), 3.91 (dd, *J* = 5.5, 4.6 Hz, 2H), 3.63 – 3.56 (m, 7H), 3.53 – 3.47 (m, 3H), 3.39 (d, *J* = 3.2 Hz, 2H), 3.22 – 3.15 (m, 2H), 2.89 (d, *J* = 5.0 Hz, 1H), 2.76 (s, 1H), 2.71 – 2.65 (m, 1H), 2.20 (t, *J* = 7.4 Hz, 2H), 2.16 (s, 2H), 1.73 – 1.24 (m, 16H), 1.05 (s, 3H). 13C NMR (500 MHz, methanol-d4) δ 176.14, 166.11, 155.95, 138.84, 132.43, 124.89, 116.06, 113.71, 83.18, 71.63, 71.58, 71.48, 71.24, 70.59, 70.56, 63.36, 61.62, 56.99, 51.35, 45.01, 41.11, 41.04, 40.35, 38.42, 36.74, 34.37, 30.74, 30.67, 29.77, 29.50, 28.79, 27.57, 26.85, 24.65, 14.91. HRMS (ESI): calcd. for C38H56N6O7S (M)•+: 741.4004 found: 741.4013.

**3. Cloning of the bait and prey vector for spot test**

The *dhfr* gene was amplified from genomic DNA of *E. coli* using Thermo Scientific Phusion High-Fidelity DNA Polymerase and the following primers containing a restriction site for NdeI: forward primer: 5’-CATGGAGGCC CATATG atgatcagtctgattgcggc-3’

Reverse primer: 5’-GCAGGTCGAC CATATG ttaccgccgctccagaatct-3’ The *E. coli* DH5-α *dhfr* sequence from NCBI Gene (gene 944790) was used to determine the primer sequences.

CDK5 was amplified from a cdk5 containing plasmid for mammalian expression (Plasmid 1870, addgene) using the following primers adding BamHI and EcoRI restriction sites: forward primer: 5‘-C ATG GAG GCC GAATTC ATG CAG AAA TAC GAG AAA CTG GAA-3’

Reverse primer: 5’-GC AGGTCGACGGATCC GGA TCC GGG CGG ACA GAA GTC GGA-3’.

The PCR products were analyzed by a 1% agarose gel and purified using a gel extraction kit (Qiagen). The purified inserts, the bait vector pGBKT7, and the prey vector pGADT7 (Takara Bio) were digested with High Fidelity NdeI (New England Biolabs) only (DHFR and pGBKT7) and BamHI and EcoRI (CDK5 and pGADT7, Thermo Fisher Scientific); lower concentrations than indicated in the protocol were used for EcoRI and CDK5, since CDK5 contains a restriction site for EcoRI. The vectors were further dephosphorylated by directly adding 1 µl of FastAP Thermosensitive Alkaline Phosphatase (Thermo Scientific). Vector and insert were again purified using a gel extraction kit. Ligation was carried out in a 1:3 ratio (vector: insert) using the protocol from Thermo Fisher Scientific at room temperature for 30 min, followed by heat shock transformation of the ligation mixture into chemical competent *E. coli* DH5-α. Plasmid isolation was performed using the QIAprep® Spin Miniprep Kit (Qiagen). They were analyzed by PCR and sequencing using a standard T7 primer (Eurofins).

**4. Sequencing result of PLOD2 hit**

GTTCTCTTCGTCCTCATCATGATGCTTCTACATTTACCATAAACATTGCACTTAATAACGTGGGAGAAGACTTTCAGGGAGGTGGTTGCAAATTTCTAAGGTACAATTGCTCTATTGAGTCACCACGAAAAGGCTGGAGCTTCATGCATCCTGGGAGACTCACACATTTGCATGAAGGACTTCCTGTTAAAAATGGAACAAGATACATTGCAGTGTCATTTATAGATCCCTAAGTTATTTACTTTTCATTGAATTGAAATTTATTTTGGATGAATGACTGGCATGAACACGTCTTTGAAGTTGTGGCTGAGAAGATGAGAGGAATATTTAAATAACATCAACAGAACAACTTCACTTTGGGCCAAACATTTGAAAAACTTTTTATAAAAAATTGTTTGATATTTCTTAATGTCTGCTCTGAGCCTTAAAACACAGATTGAAGAAGAAAAGAAAGAAAAAACTTAAATATTTATTTCTATGCTTTGTTGCCTCTGAGAATAATGACAATTTATGAATTTGTGTTTCAAATTGATAAAATATTTAGGTACAAATAACAAGACTAATAATATTTTCTTATTTAAAAAAAGCATGGGAAGATTTTTATTTATCAAAATATAGAGGAAATGTAGACAAAATGGATATAAATGAAAATTACCATGTTGTAAAACCTTGAAAATCAGATTCTAACTGGATTTGTATGCAACTAAGTATTTTTCTGAACACCTATGCAGGTCTTATTTACAGTAGTTACTAAGGGAACACACAAAGAATTACACAACGTTTTCCTCAAGAAAATGGTACAAAACACAACCGAGGAGCGTATACAGTTGAAAACATTTTTGTTTTGATTGGAAGGCAGATTATTTTATATTAGTATTAAAAATCAAACCCTATGTTTCTTTCAGATGAATCTTCCAAAGTGGATTATATTAAGCAGGTATTAGATTTAGGAAAACCTTTCCATTTCTTAAAGTATTATCAAGTGTCAAGATCAGCAAGTGTCCTTAAGTCAAACAGGTTTTTTTTGTTGGTGGTTTTTGCTTTGTTTCCTTTTTTAGAAAGTTCTAGAAAATAGGGAAAC

**5. Colony PCR**


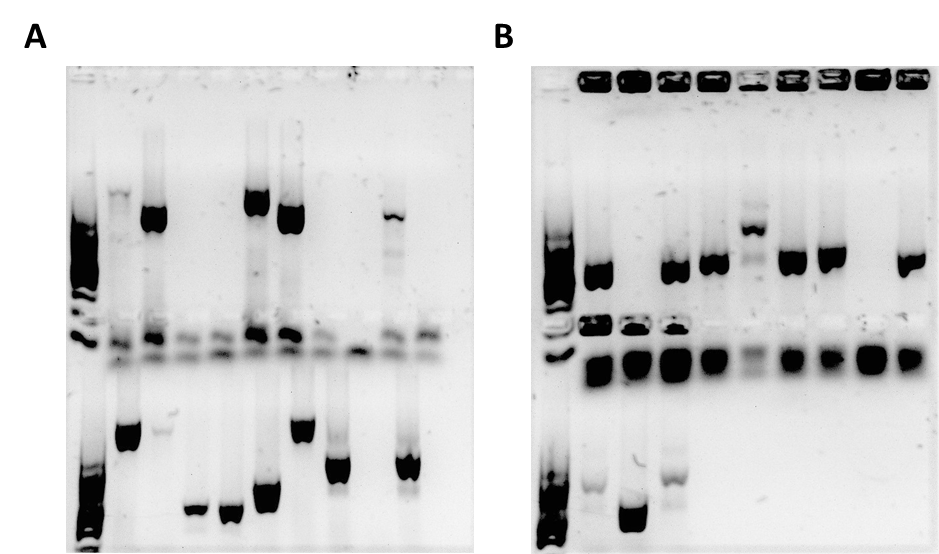


Figure 1. Exemplary gels from a colony PCR for colonies classified as hits. A. Colonies from the mammary gland library screening. B. Colonies from the pancreas library screening. For colonies for which no band was obtained, plasmids were isolated and the PCR was repeated.

**6. Affinity Chromatography**

6.1. The three replicates for the pull-down experiment using a lysate of yeast cells overexpressing the PLOD2 fragment identified in the Y3H screen as GAL4 AD fusion are shown. Top panel: loading control. Bottom panel: Western blot using GAL4 AD antibody.


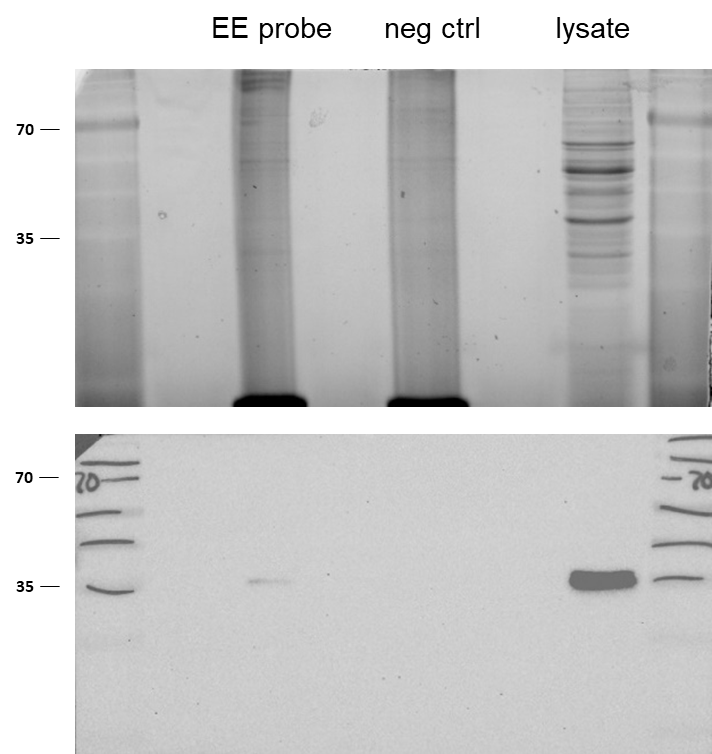


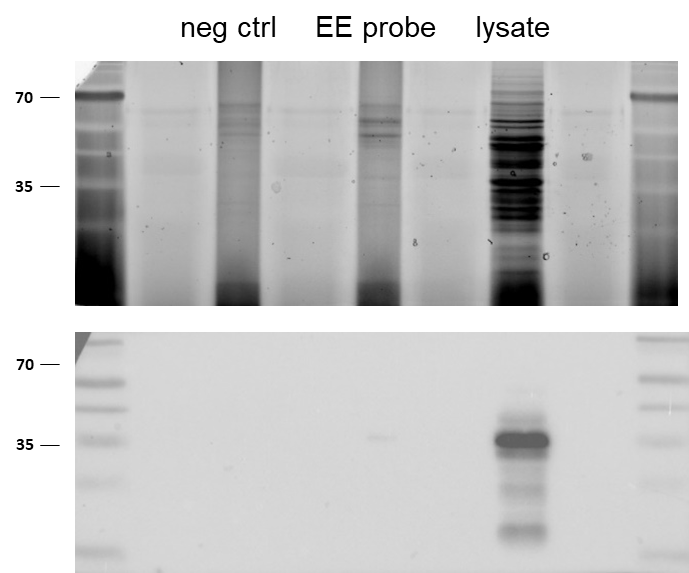


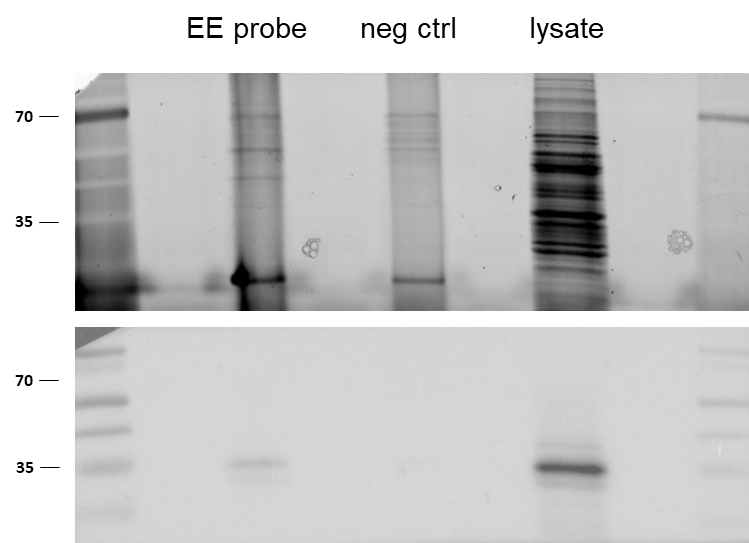


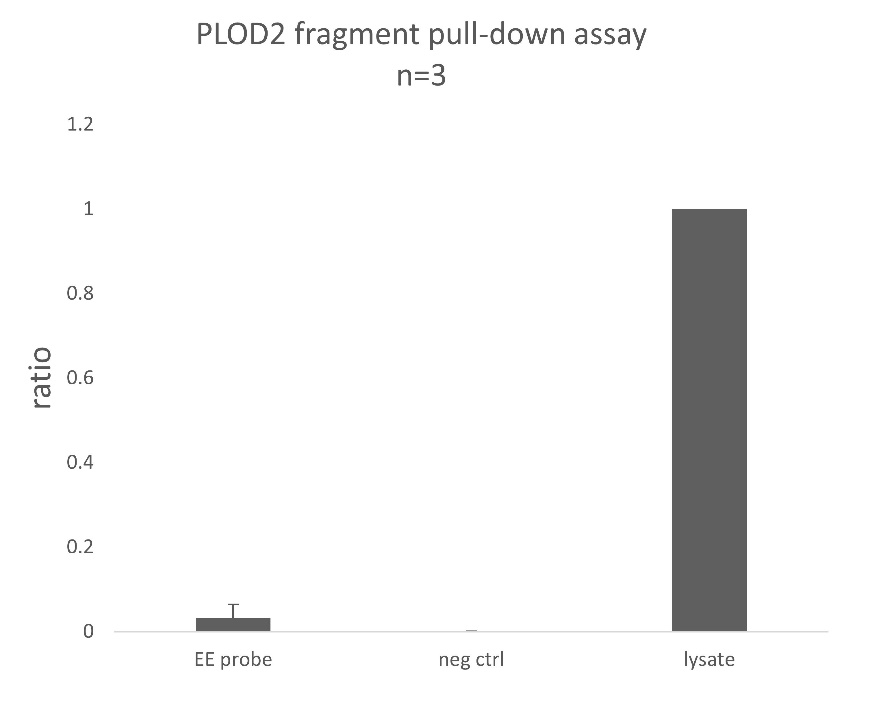


Figure 2. Evaluation of Western blot results using a yeast cell lysate overexpressing the PLOD2 fragment. Intensities of bands were evaluated using ChemiDoc and are shown relative to the band of PLOD2 fragment in the lysate (according to 1 mg of total protein as determined by a Bradford assay).

6.2. The three replicates for the pull-down experiment using human recombinant PLOD2 are shown. Top panel: loading control. Bottom panel: Western blot using PLOD2 antibody.


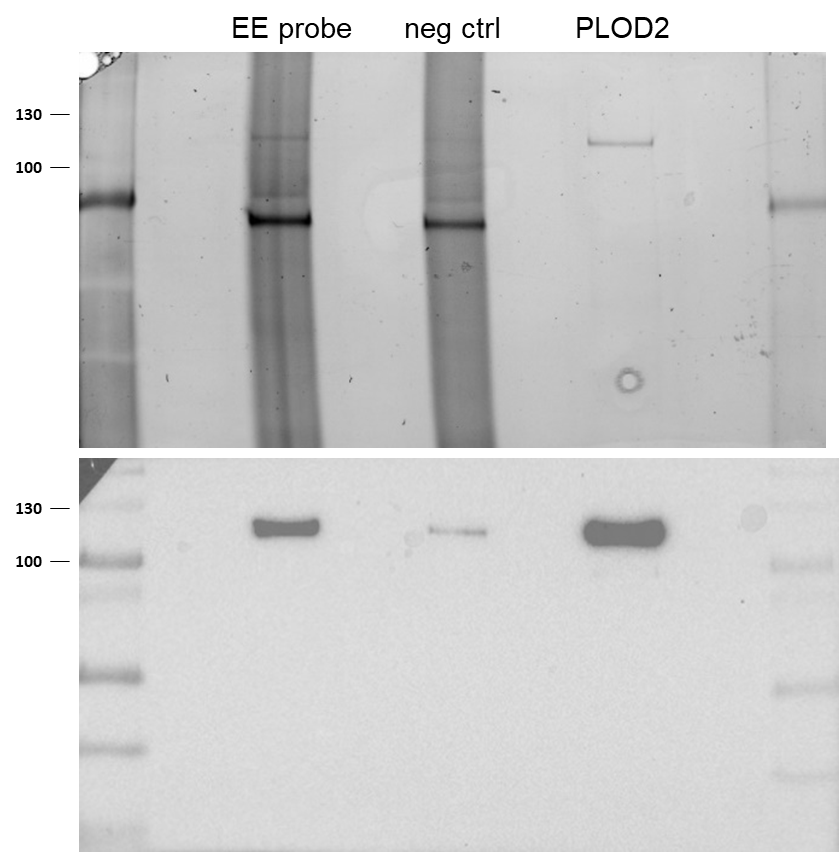


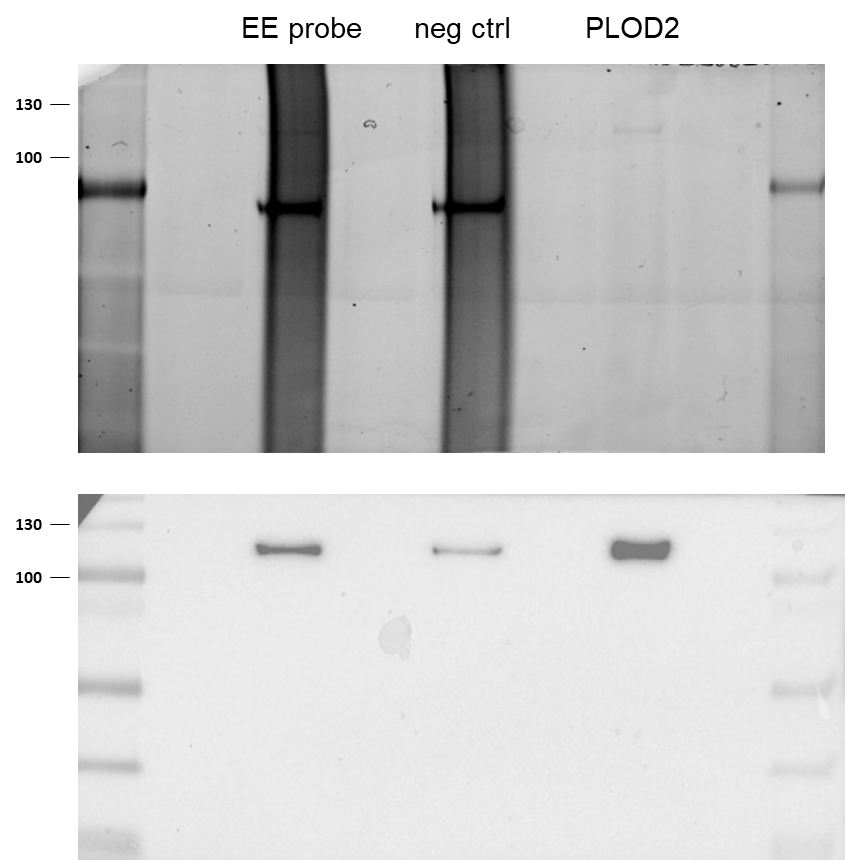


*
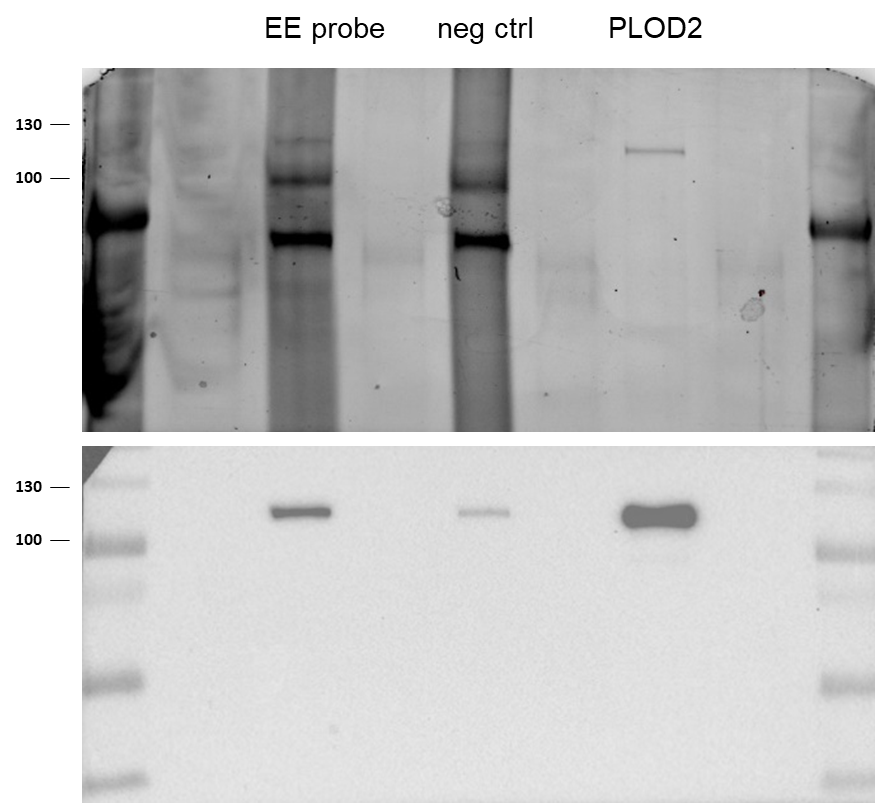
*


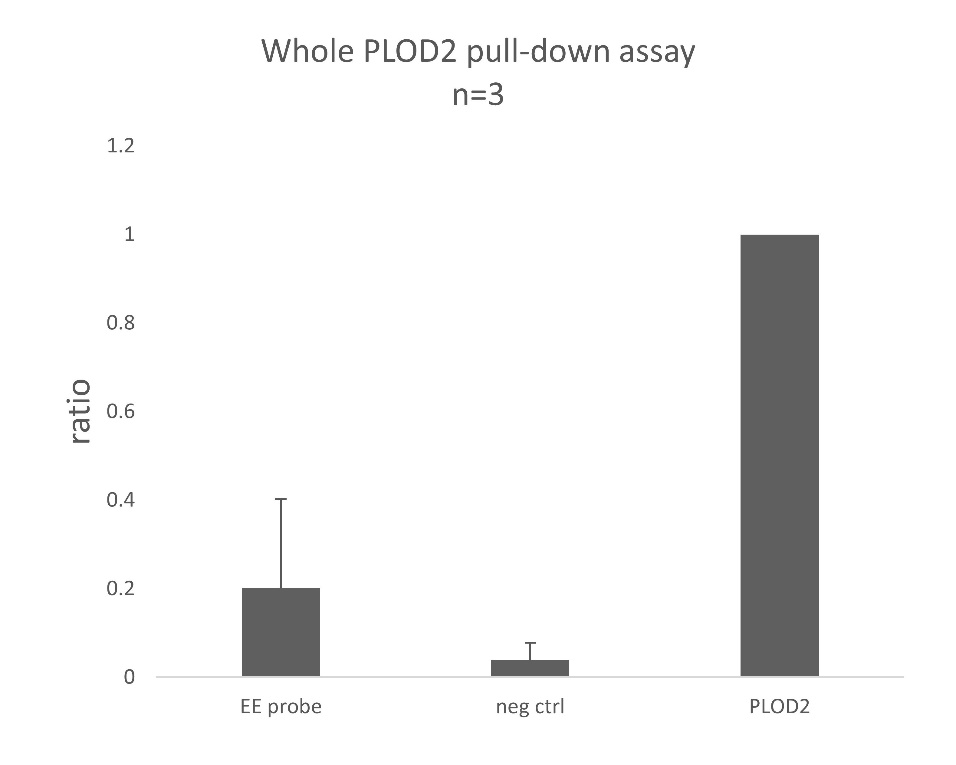


Figure 3. Evaluation of Western blot results using whole human recombinant PLOD2. Intensities of bands were evaluated using ChemiDoc and are shown relative to the band of 200 ng of PLOD2.

**7. PLOD2 expression levels**

HeLa cells were seeded in 6 well plates (3 x 105 cells/well) and allowed to attach for 24 h. Cells were stimulated with compounds and DMSO control for 24 h, before cell medium was removed and cells were washed with ice cold PBS twice. 100 µL of lysis buffer (50 mm Tris/HCl, 150 mm NaCl, 1% Nonidet, NP-40, 0.25% Sodium deoxycholate, 0.1% SDS) were added to each well and plates were incubated overnight at -80°C. Cells were scraped with a cell scraper after thawing on ice. Cell lysates were collected and centrifuged at *14 000* rpm for 10 min at 4°C, before protein concentrations were determined by Bradford assay using bovine serum albumin as standard. Proteins were denatured by heating at 99°C for 5 min in SDS sample buffer and equal amounts of protein were separated by sodium dodecyl sulfate polyacrylamide gel electrophoresis (SDS-PAGE) on discontinuous polyacrylamide gels (12%). Proteins from the gels were transferred to 0.2 µm polyvinylidene difluoride (PVDF) membranes by western blotting. For detection of PLOD2 expression, a PLOD2 primary antibody (abcam) and a Goat anti-Rabbit IgG secondary antibody (dianova) were used. Protein bands were detected by chemiluminescence using a ChemiDoc™ Touch Imaging System (Bio-Rad, Munich, Germany). Protein bands were analyzed by comparison with the Page Ruler™ Plus Prestained Protein Ladder and intensities of protein bands were analyzed using Image Lab™ software (Bio-Rad, Munich, Germany).

The three replicates for the PLOD2 expression experiment are shown. Top panel: loading control. Bottom panel: Western blot using a PLOD2 antibody for detection.


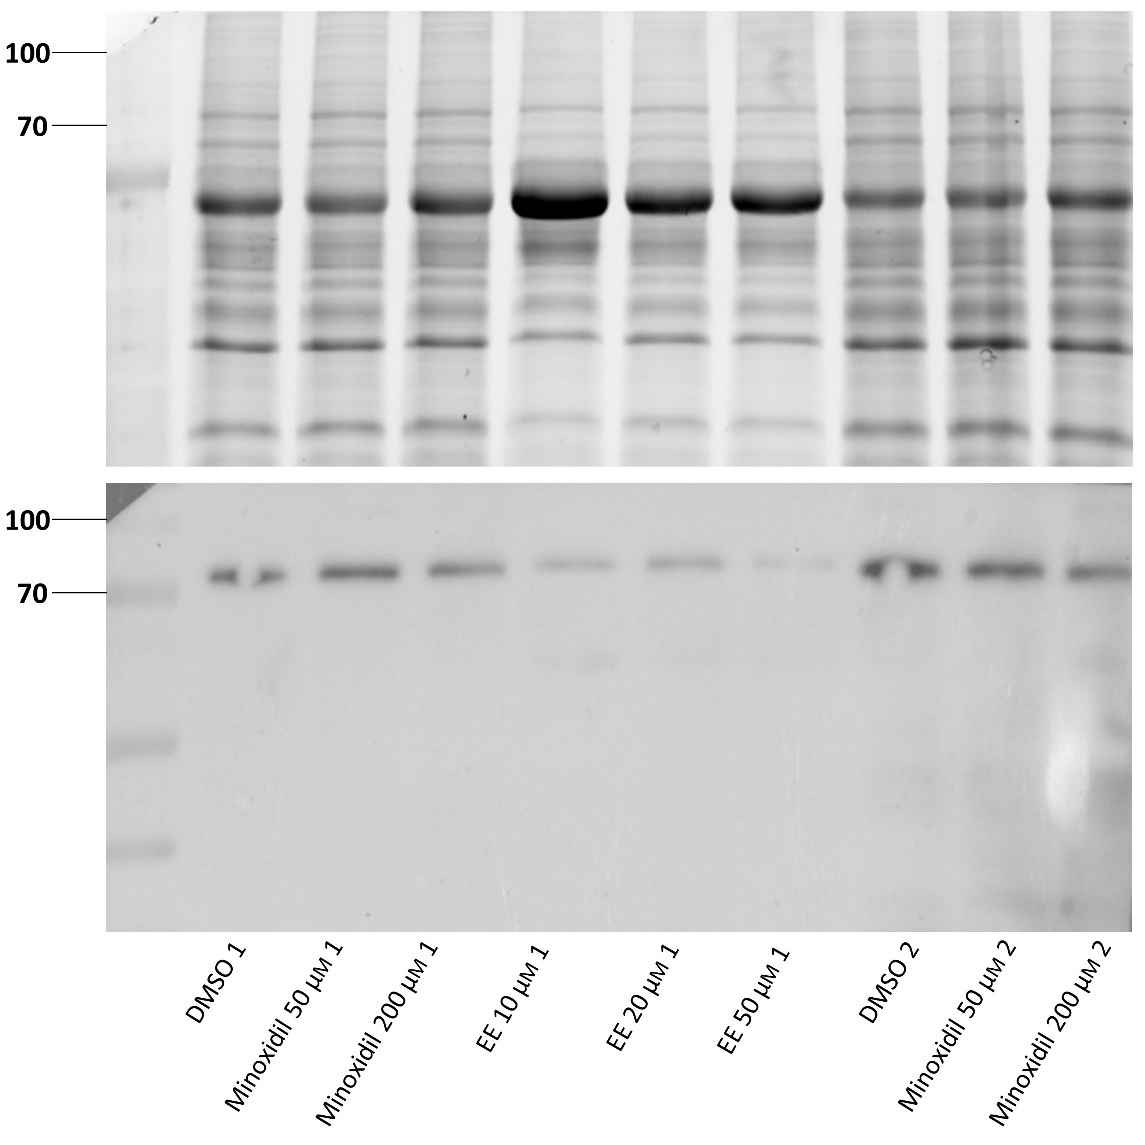


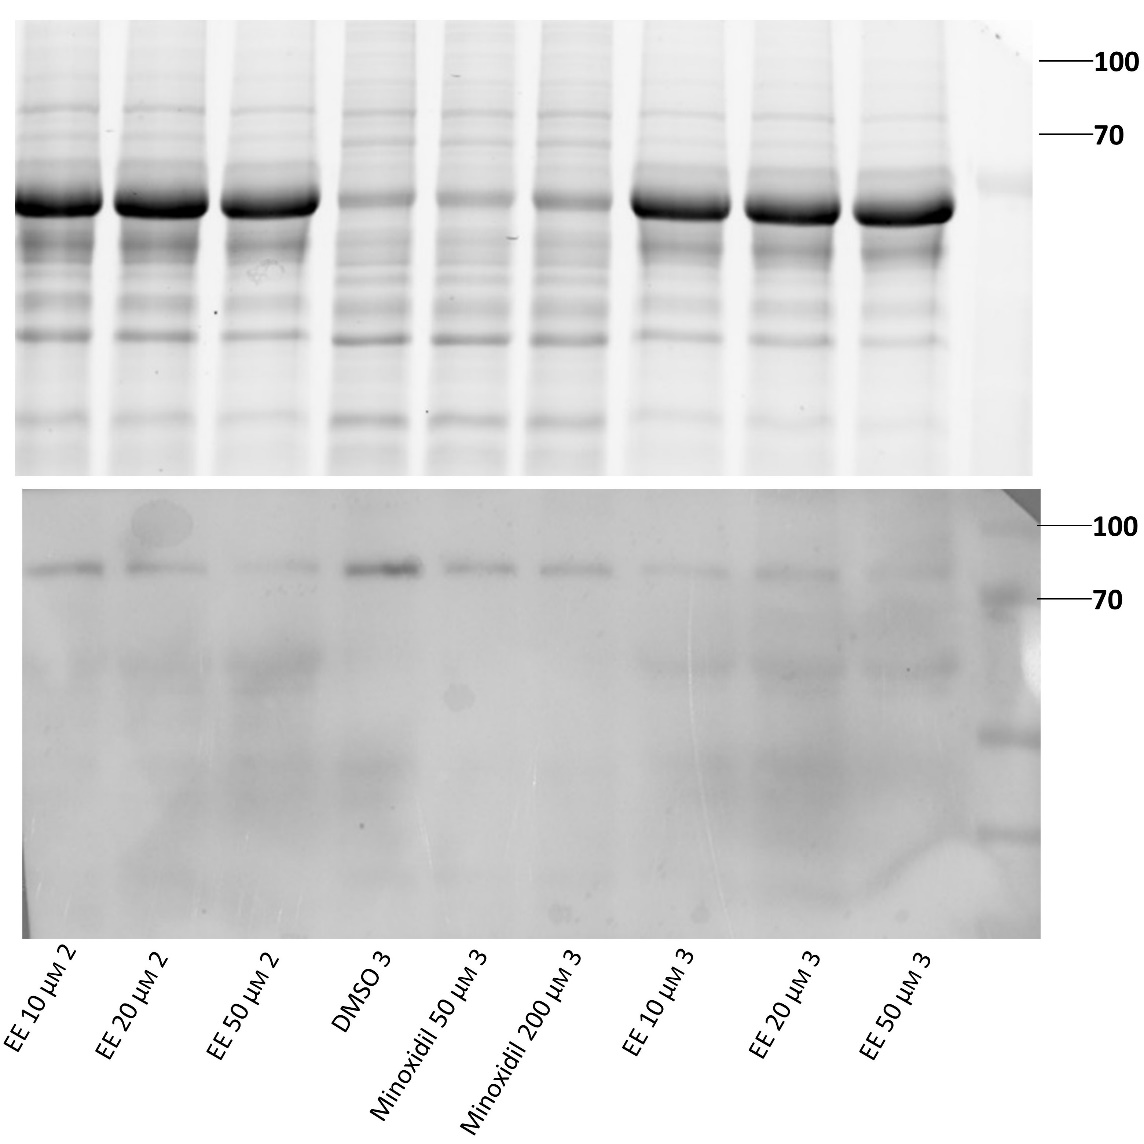


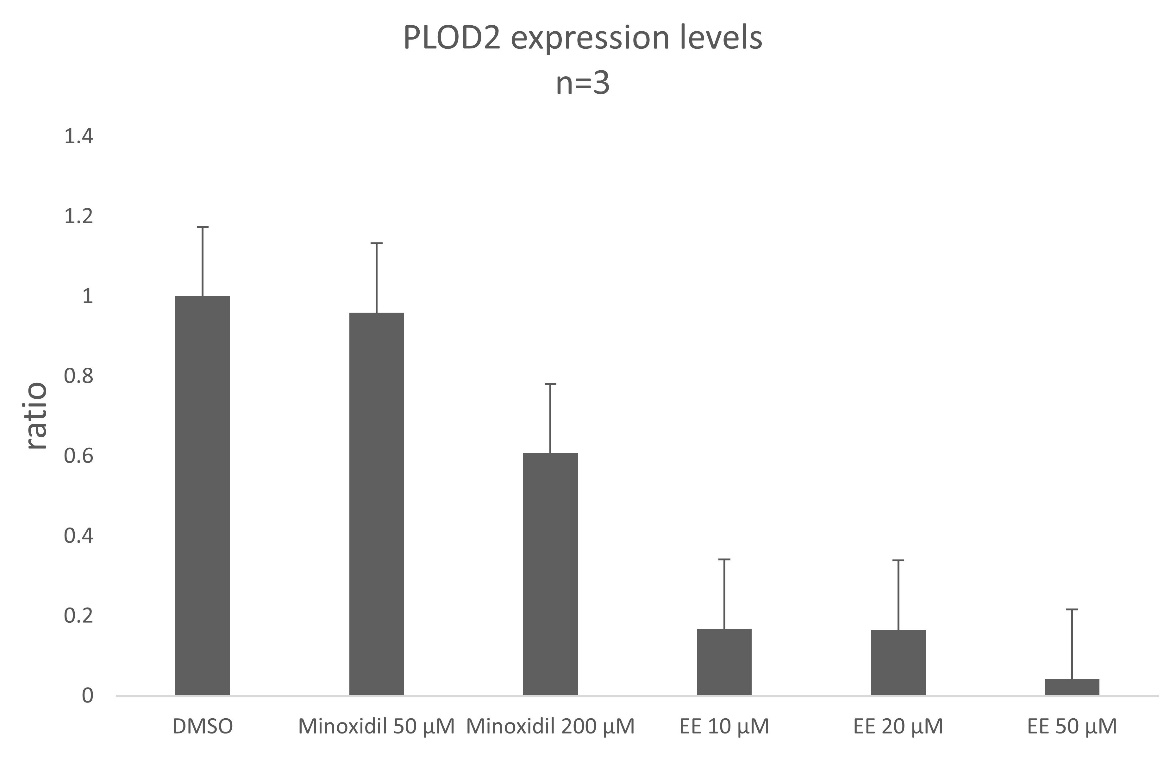


Figure 4. Evaluation of PLOD2 expression levels using Western blot of lysates of HeLa cells which were treated with minoxidil or EE. Intensities of bands were evaluated using ChemiDoc and are shown relative to a DMSO control.
